# Supplementary material for: Hydrogel Formulations of Antibacterial Pyrazoles Using a Synthesized Polystyrene-Based Cationic Resin as a Gelling Agent
Source: MDPI journal article supplement (doi:10.3390/ijms24021109), 2023-01-06
Supplement: s1 [file s1]

## Supplementary Materials

## Hydrogel Formulations of Antibacterial Pyrazoles Using a Synthesized Polystyrene-Based Cationic Resin as Gelling Agent

Silvana Alfei <sup>1,\*</sup>, Guendalina Zuccari <sup>1,\*</sup>, Eleonora Russo <sup>2</sup>, Carla Villa <sup>2</sup>, and Chiara Brullo <sup>2</sup><sup>1</sup> Department of Pharmacy, Section of chemistry and pharmaceutical and food technologies, University of Genoa, Viale Cembrano, 4, 16148 Genoa, Italy<sup>2</sup> Department of Pharmacy (DIFAR), Section of Medicinal Chemistry and Cosmetic Product, University of Genoa, Viale Benedetto XV, 3, 16132 Genoa, Italy

\* Correspondence: alfei@difar.unige.it (S.A.); zuccari@difar.unige.it (G.Z.); Tel.: +39-010-355-2296 (S.A.)

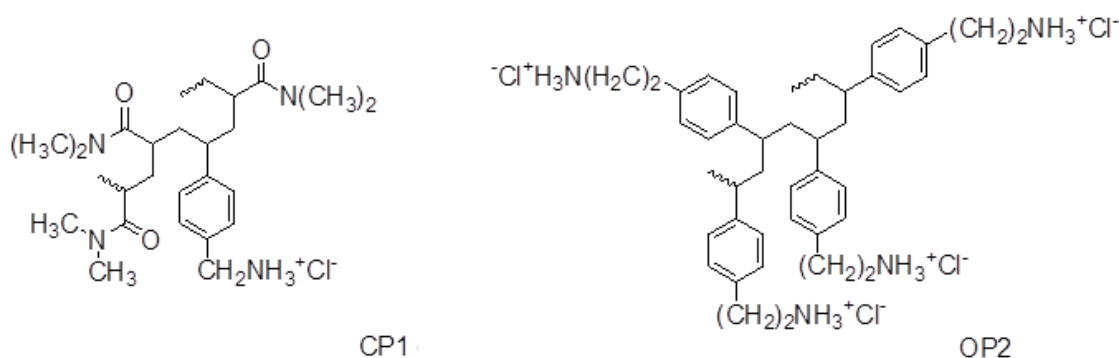

Figure S1. Structure of copolymer CP1 (left) and homopolymer OP2 (right).

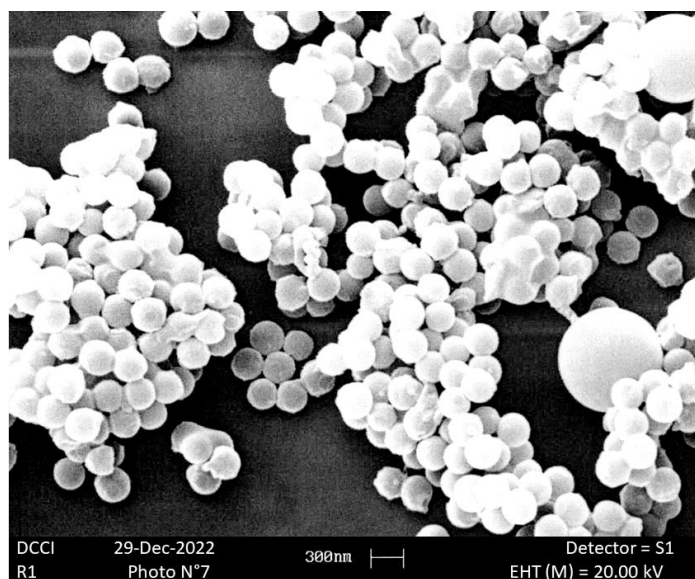

Figure S2. SEM image of resin R1.

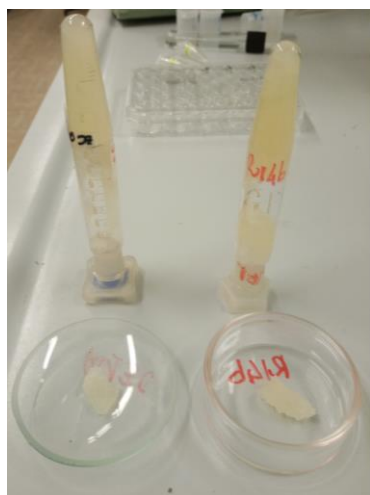

Figure S3. Appearance of R1HG-3c (left side) and R1HG-4b (right side) at their equilibrium degree of swelling (EDS).

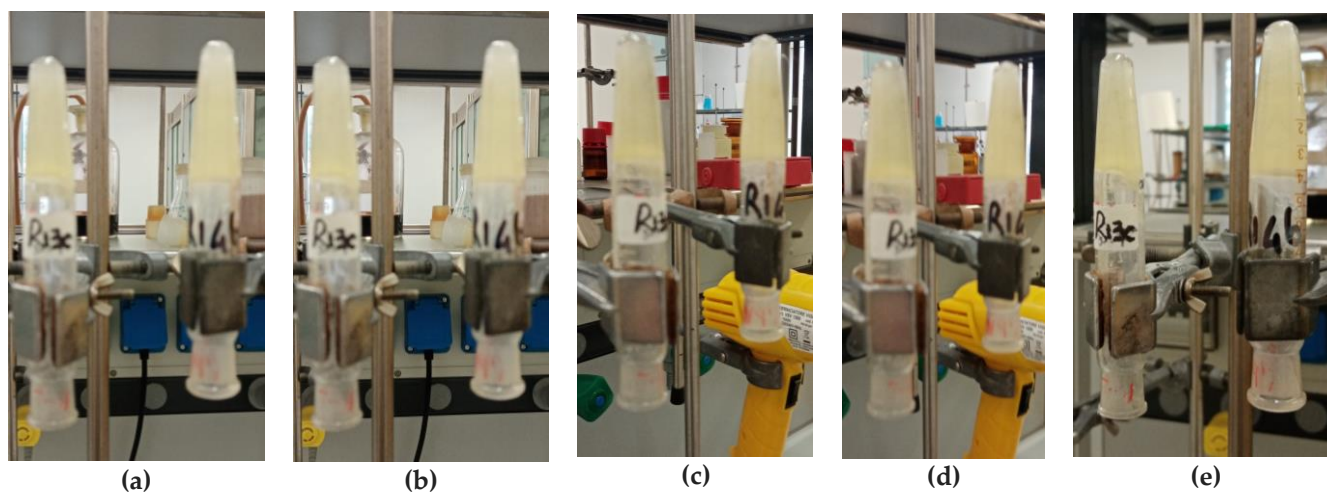

Figure S4. Appearance of 3 mL of R1HG-3c (left side of the images) and 4 mL of R1HG-4b (right side of the images) in the inverted position just prepared (a), after 1 (b), 2 (c), 3 (d) and 4 months (e) from first preparation staying at room temperature.

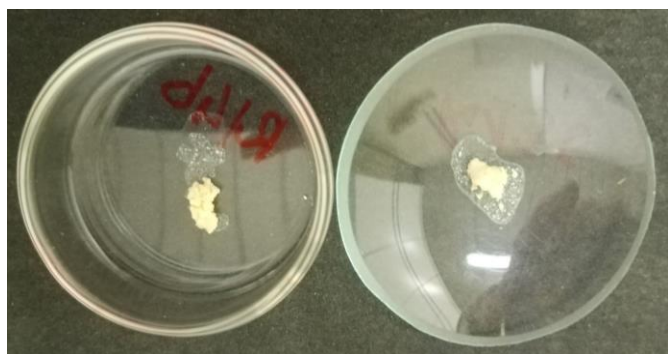

Figure S5. Appearance of fully dried D-R1HG-3c (right side) and D-R1HG-4b (left side) when a constant weight was reached.

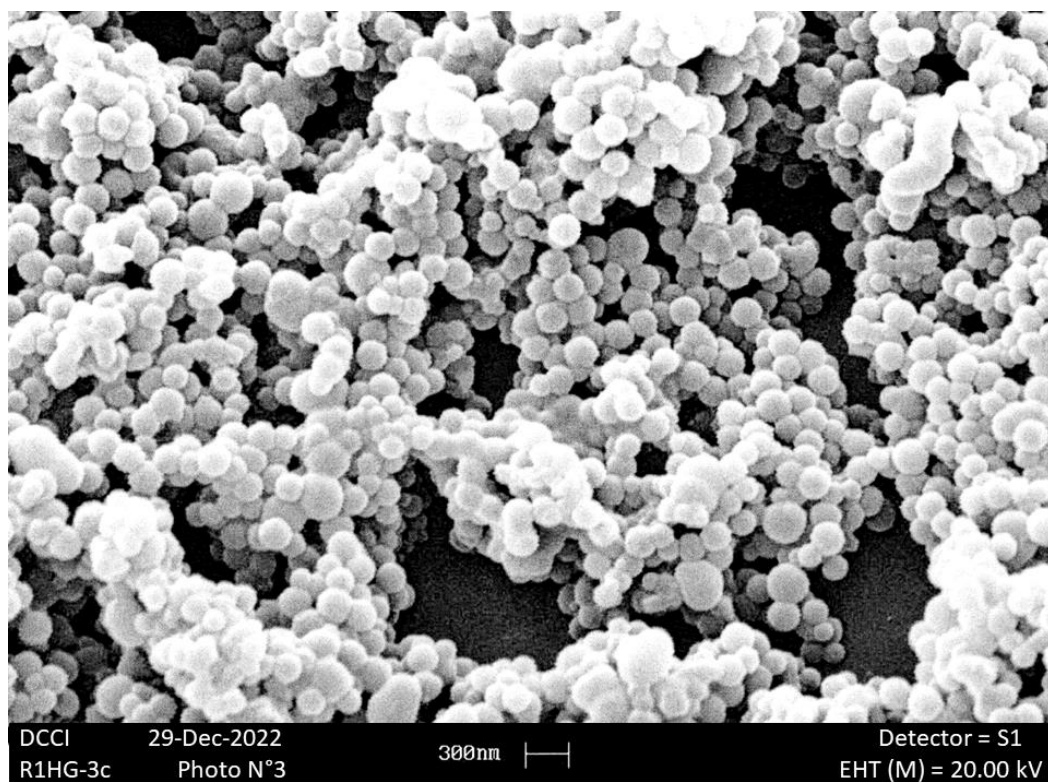

Figure S6. SEM image of the dried D-R1HG-3c.

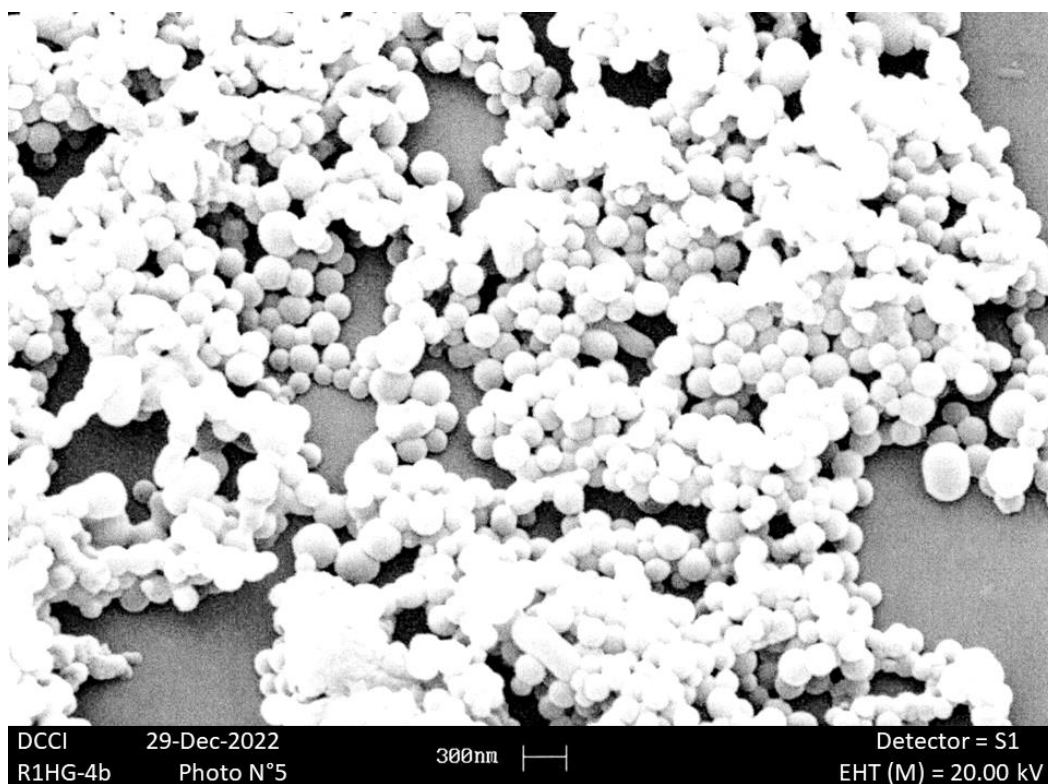

Figure S7. SEM image of the dried D-R1HG-4b.
